# Supplementary material for: Cellular and molecular landscapes of inflammation in anterior cruciate ligament rupture patients are independent on concurrent meniscal injury
Source: Research Square preprint supplement (doi:10.21203/rs.3.rs-7753452/v1), 2025-11-13

The diagram illustrates the interaction between the Extracellular Matrix (ECM) and various cell surface receptors. It is organized into four main columns, each representing a different receptor family. The ECM components are shown on the left, and the receptor subunits are on the right. Arrows indicate the binding of ECM components to specific receptor subunits.

- Column 1: Integrin VLA proteins**
  - ECM:** Collagen, Laminin, Collagen, Laminin, Chad, Laminin, Reelin, THBS, Collagen, Fibronectin.
  - Integrin VLA proteins:**
    - $\alpha 1 \beta 1$
    - $\alpha 2 \beta 1$
    - $\alpha 3 \beta 1$
    - $\alpha 4 \beta 1$
    - $\alpha 5 \beta 1$
    - $\alpha 6 \beta 1$
    - $\alpha 7 \beta 1$
- Column 2: Integrin VLA proteins**
  - ECM:** Fibronectin, Fibronectin, Tenascin, Ng2, FRAS1, FREM1/2, Tenascin, OPN, Collagen, Laminin, Collagen, Collagen, Collagen.
  - Integrin VLA proteins:**
    - $\alpha 8 \beta 1$
    - $\alpha 9 \beta 1$
    - $\alpha 10 \beta 1$
    - $\alpha 11 \beta 1$
    - $\alpha V \beta 1$
  - Leukocytes proteins:**
    - $\alpha 4 \beta 7$
- Column 3: Integrin Cytoadhesin**
  - ECM:** Vitronectin, Fibronectin, VWF, OPN, BSP, DMP1, MEPE, Tenascin, THBS, Vitronectin, Fibronectin, VWF, THBS, Vitronectin, BSP, OPN, Fibronectin, Tenascin, DSP, Collagen, Fibronectin, Laminin, Fibronectin, Laminin, Laminin.
  - Integrin Cytoadhesin:**
    - $\alpha V \beta 3$
    - $\alpha I b \beta 3$
    - Other combination:**
      - $\alpha V \beta 5$
      - $\alpha V \beta 6$
      - $\alpha V \beta 8$
      - $\alpha 2 \beta 4$
- Column 4: Proteoglycan**
  - ECM:** HA, Collagen, Fibronectin, Laminin, Collagen, Fibronectin, THBS, Tenascin, Laminin, THBS, VWF, Collagen, Laminin, Agrin, Perlecan, THBS, HA.
  - Proteoglycan:**
    - CD44
    - Syndecan
    - SV2
    - CD36
    - GPV
    - GP1b $\alpha$
    - GP1b $\beta$
    - GP1X
    - GPV1
    - $\alpha DG \beta DG$
    - Ig-SF
    - CD47
    - RHAMM

**Focal adhesion** is indicated between the third and fourth columns.

Data on KEGG graph  
Rendered by Pathview

# ARRHYTHMOGENIC RIGHT VENTRICULAR CARDIOMYOPATHY

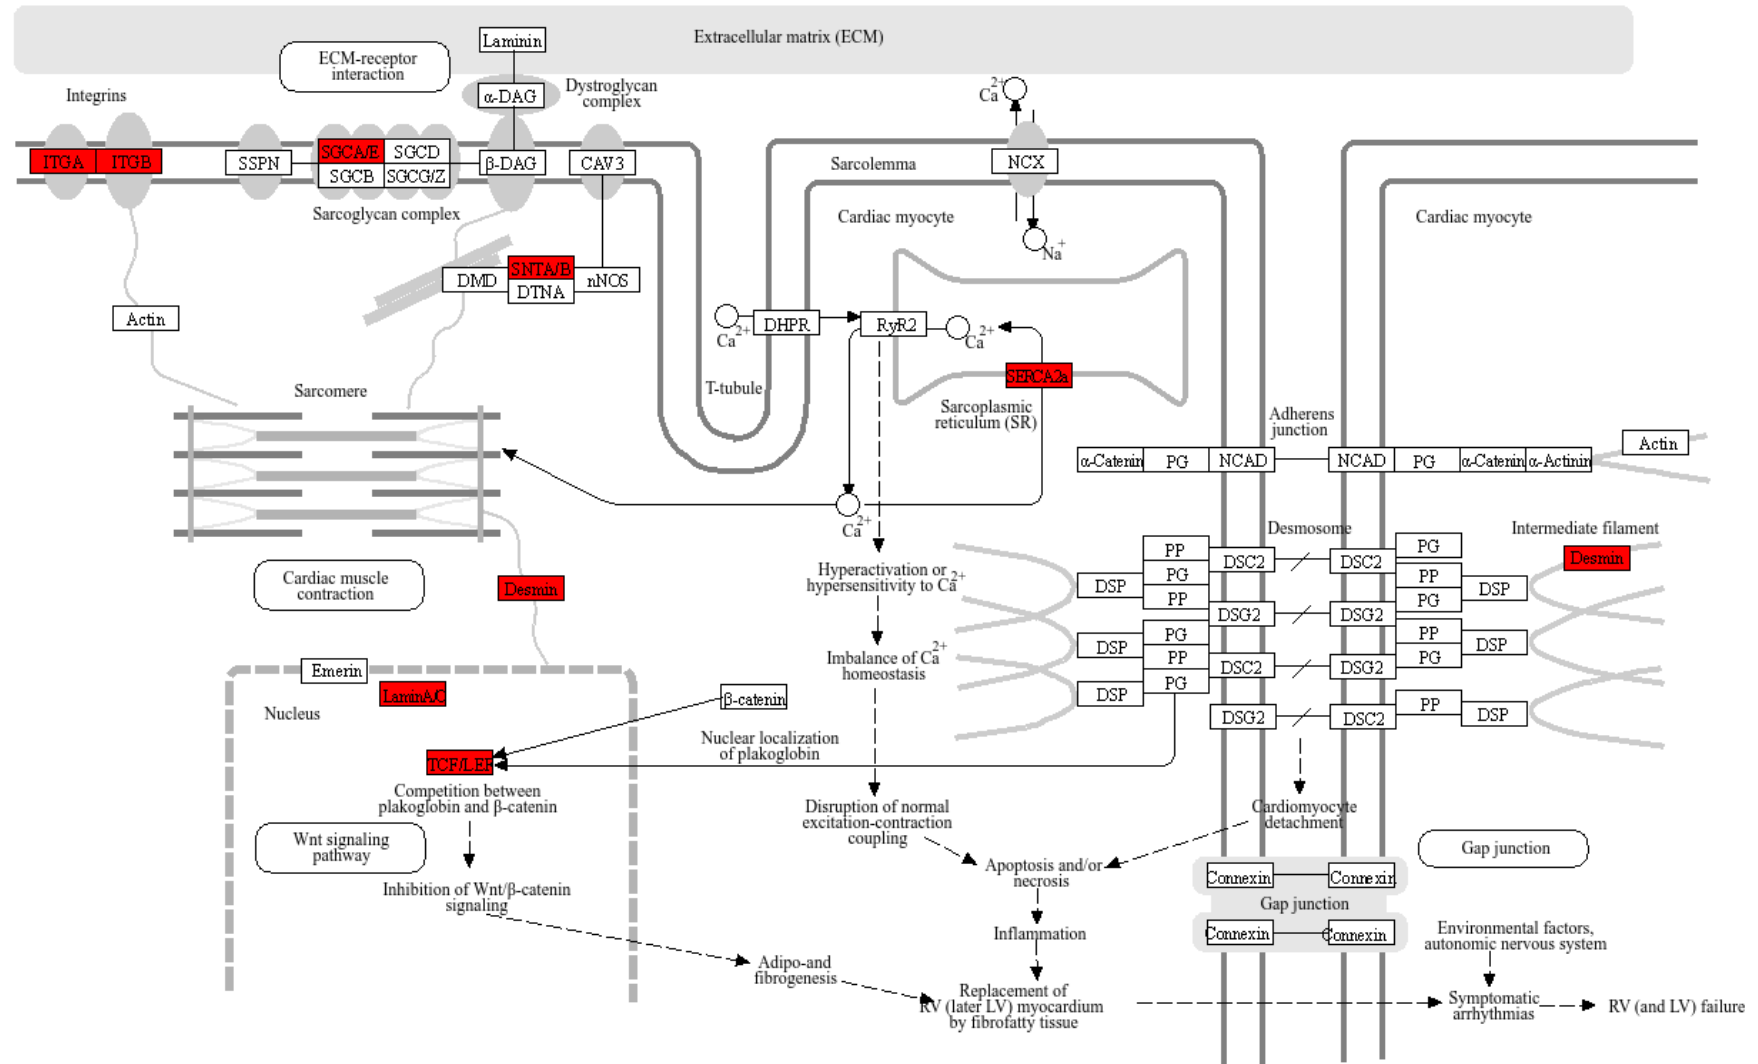

Data on KEGG graph  
Rendered by Pathview

# HYPERTROPHIC CARDIOMYOPATHY

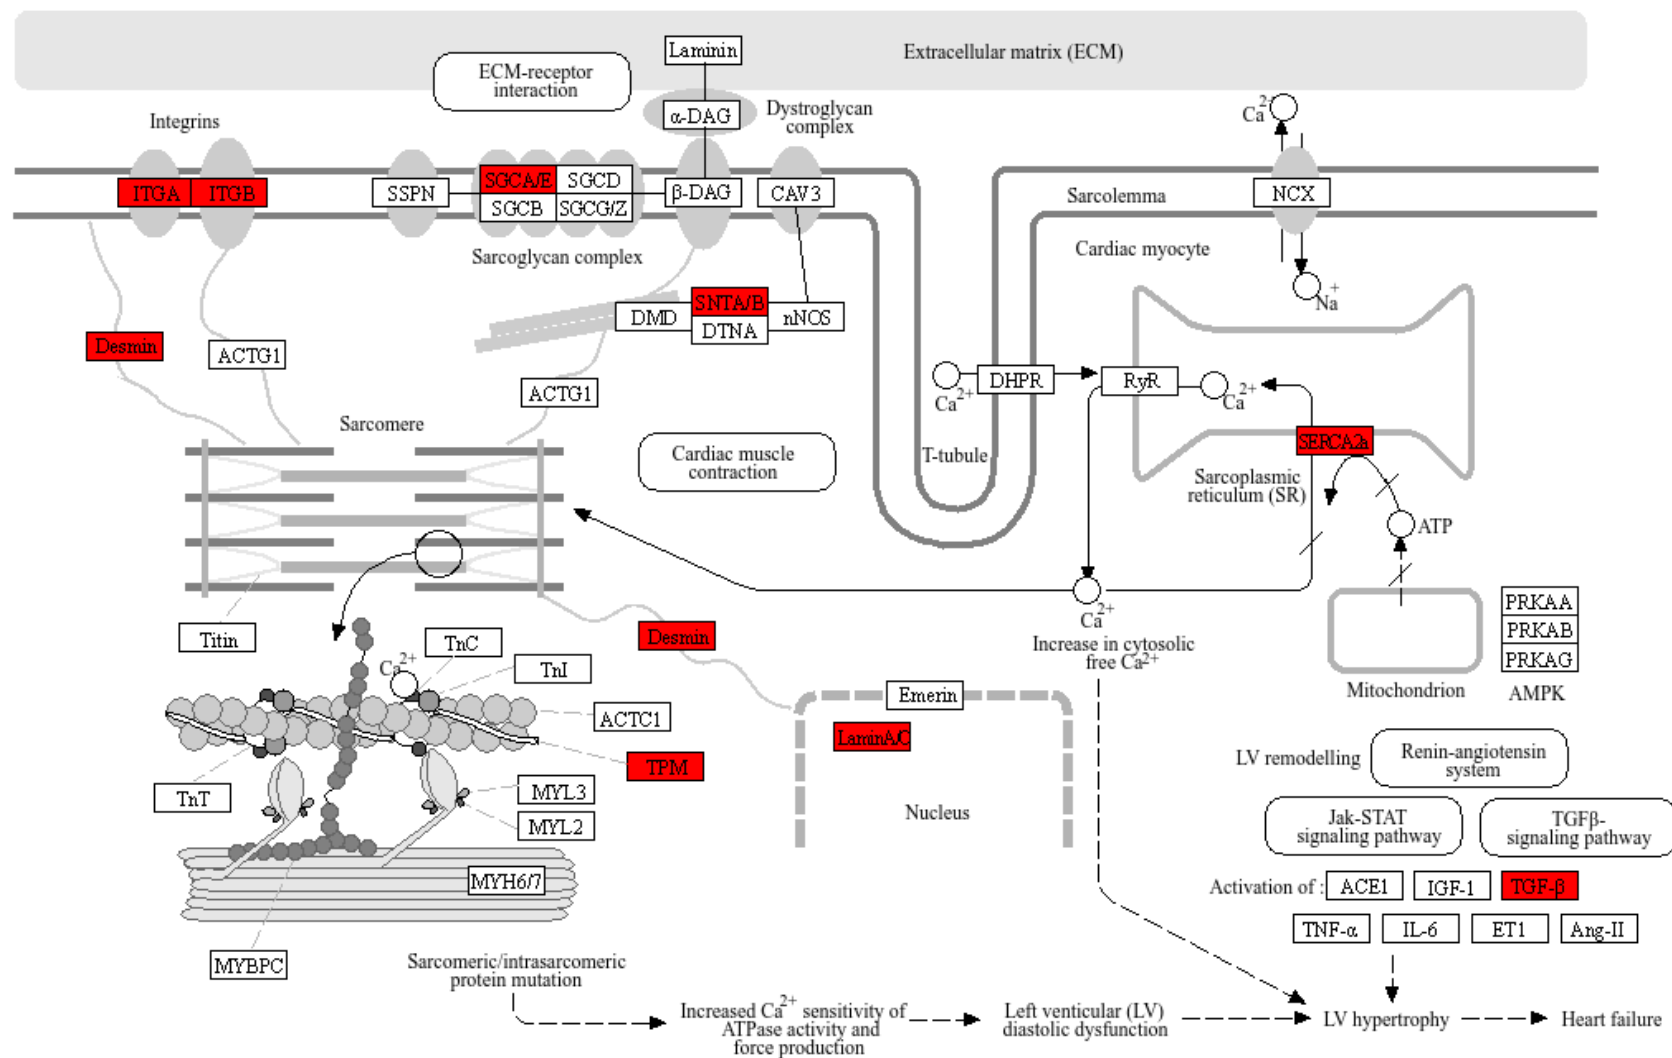

Data on KEGG graph  
 Rendered by Pathview

## CYTOSKELETON IN MUSCLE CELLS

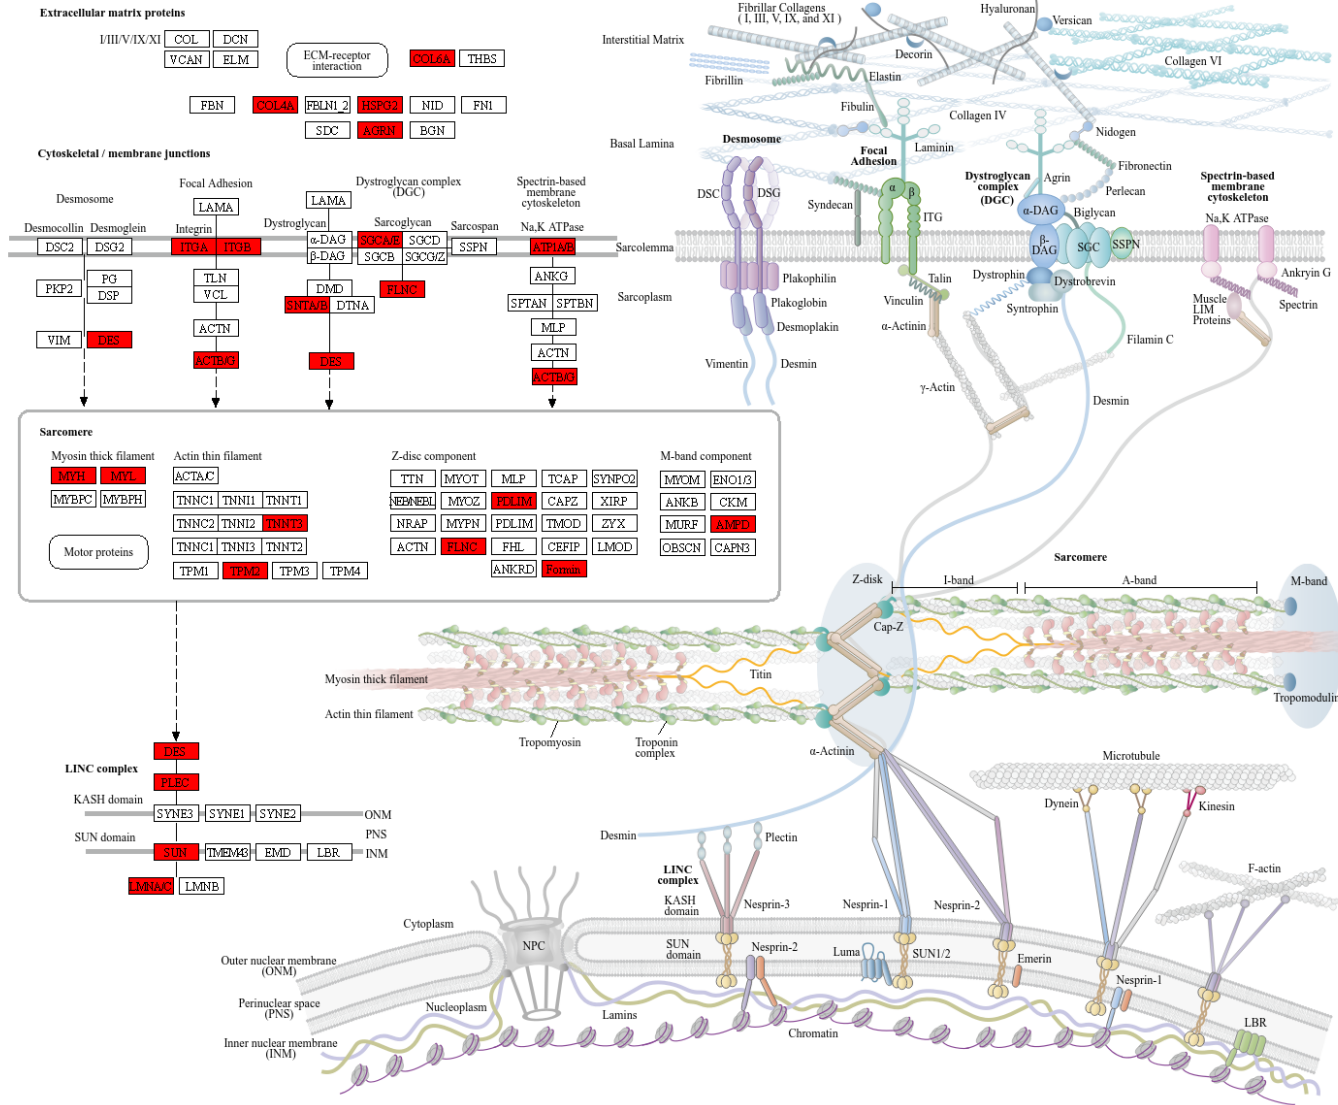

**Data on KEGG graph  
Rendered by Pathview**

# DILATED CARDIOMYOPATHY

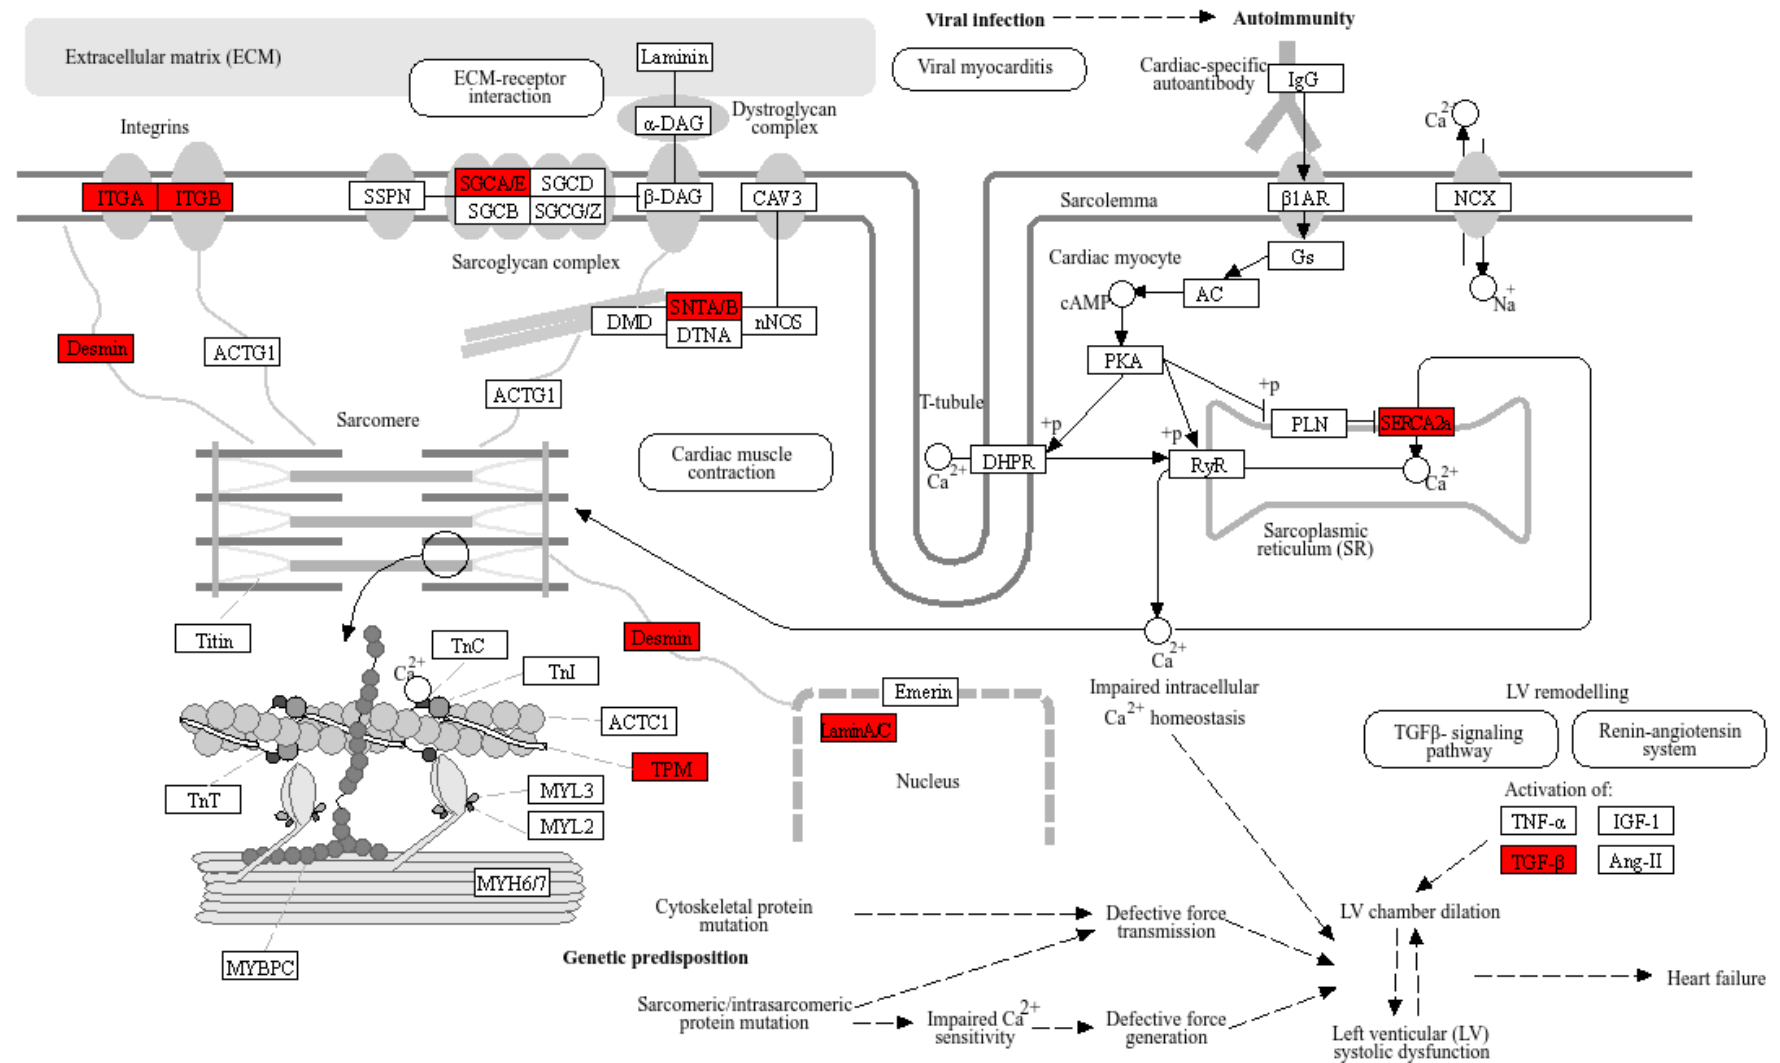

Data on KEGG graph  
Rendered by Pathview

# FOCAL ADHESION

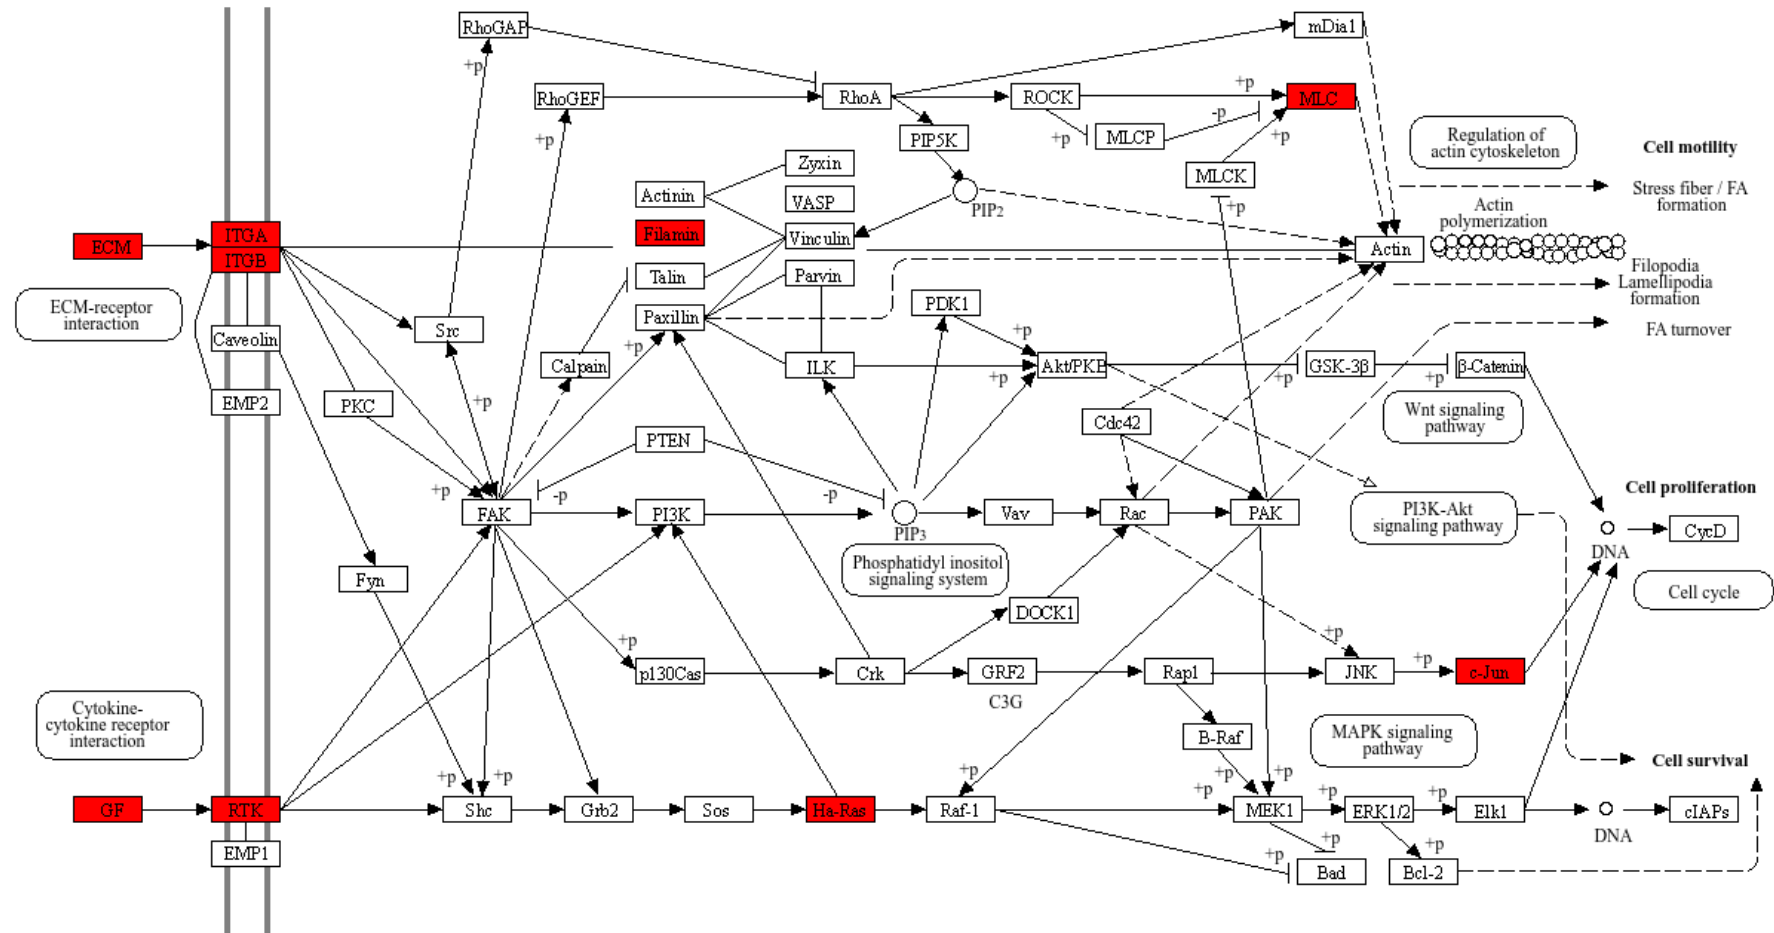

Data on KEGG graph  
Rendered by Pathview

# HUMAN PAPILLOMAVIRUS INFECTION

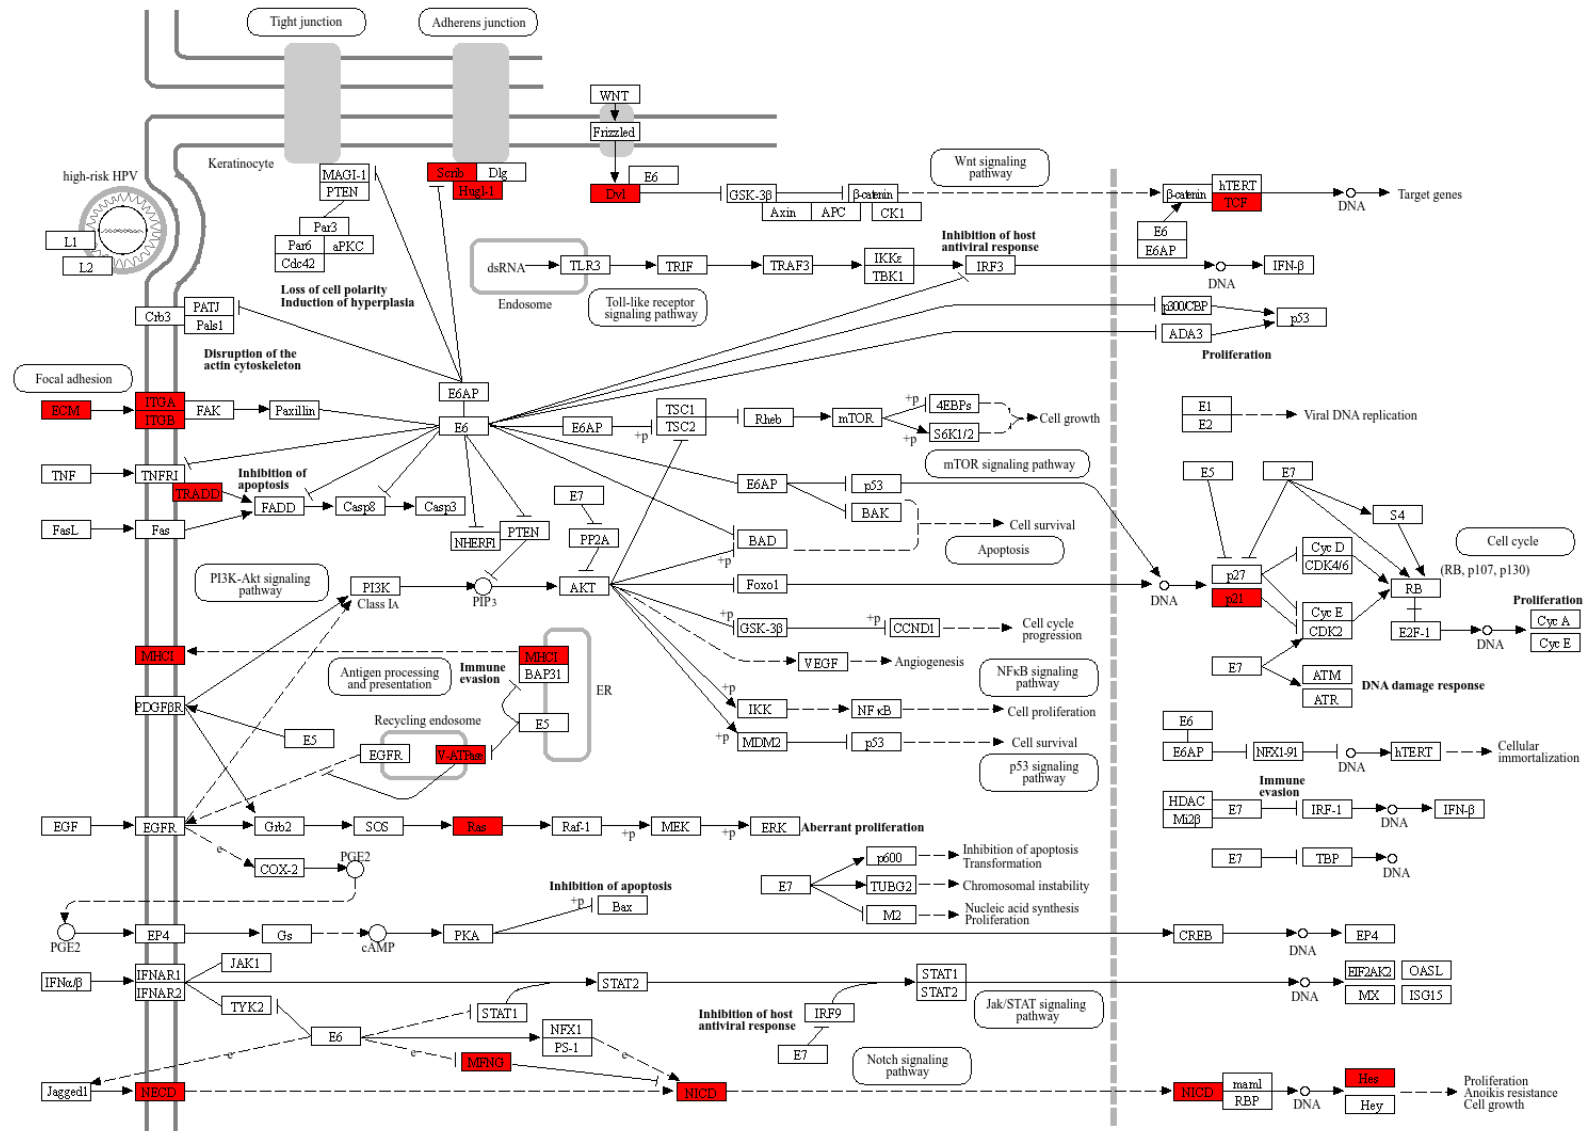

Data on KEGG graph  
Rendered by Pathview

# MAPK SIGNALING PATHWAY

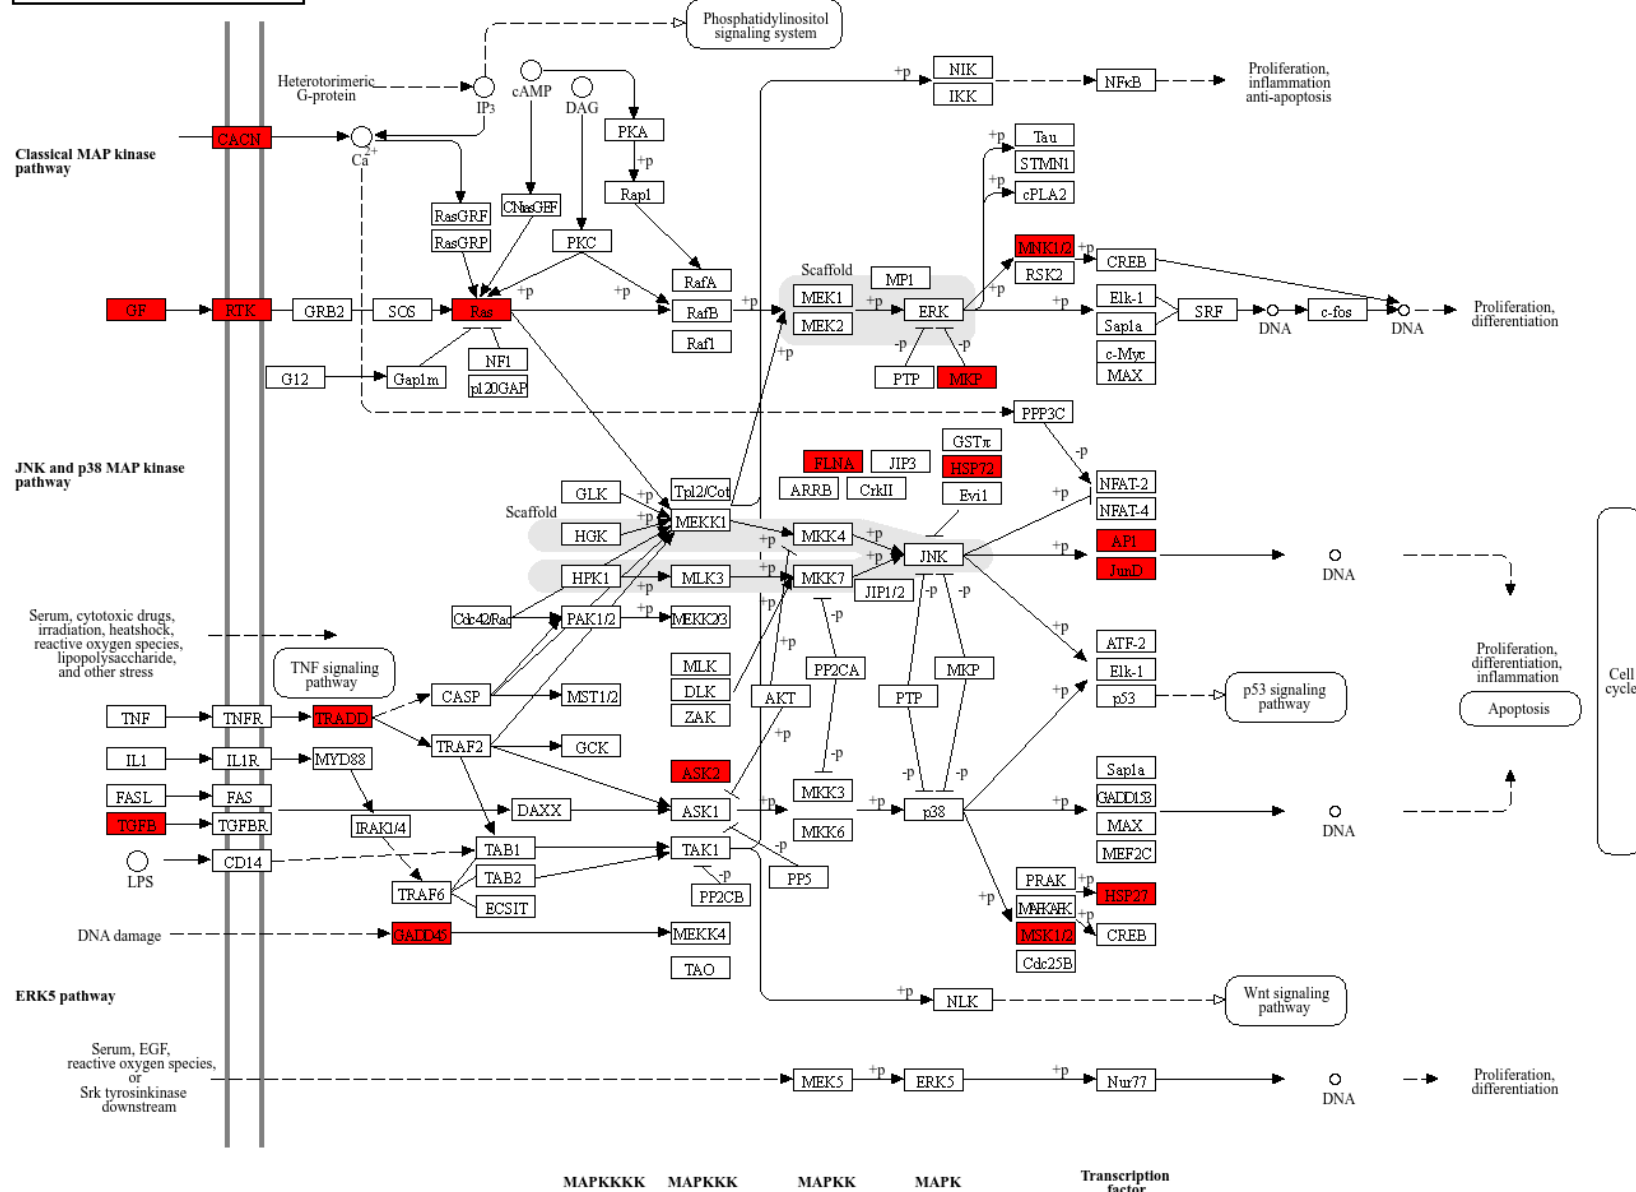

Supplement: Supplementary file 2 [file 6f7649b9fb2c15b0e39f8c3a.pdf]
