# Supplementary material for: Cellular and molecular landscapes of inflammation in anterior cruciate ligament rupture patients are independent on concurrent meniscal injury
Source: Research Square preprint supplement (doi:10.21203/rs.3.rs-7753452/v1), 2025-11-13
Supplement: Supplementary file 3 [file d3579c76f004952f89b0a13d.pdf]

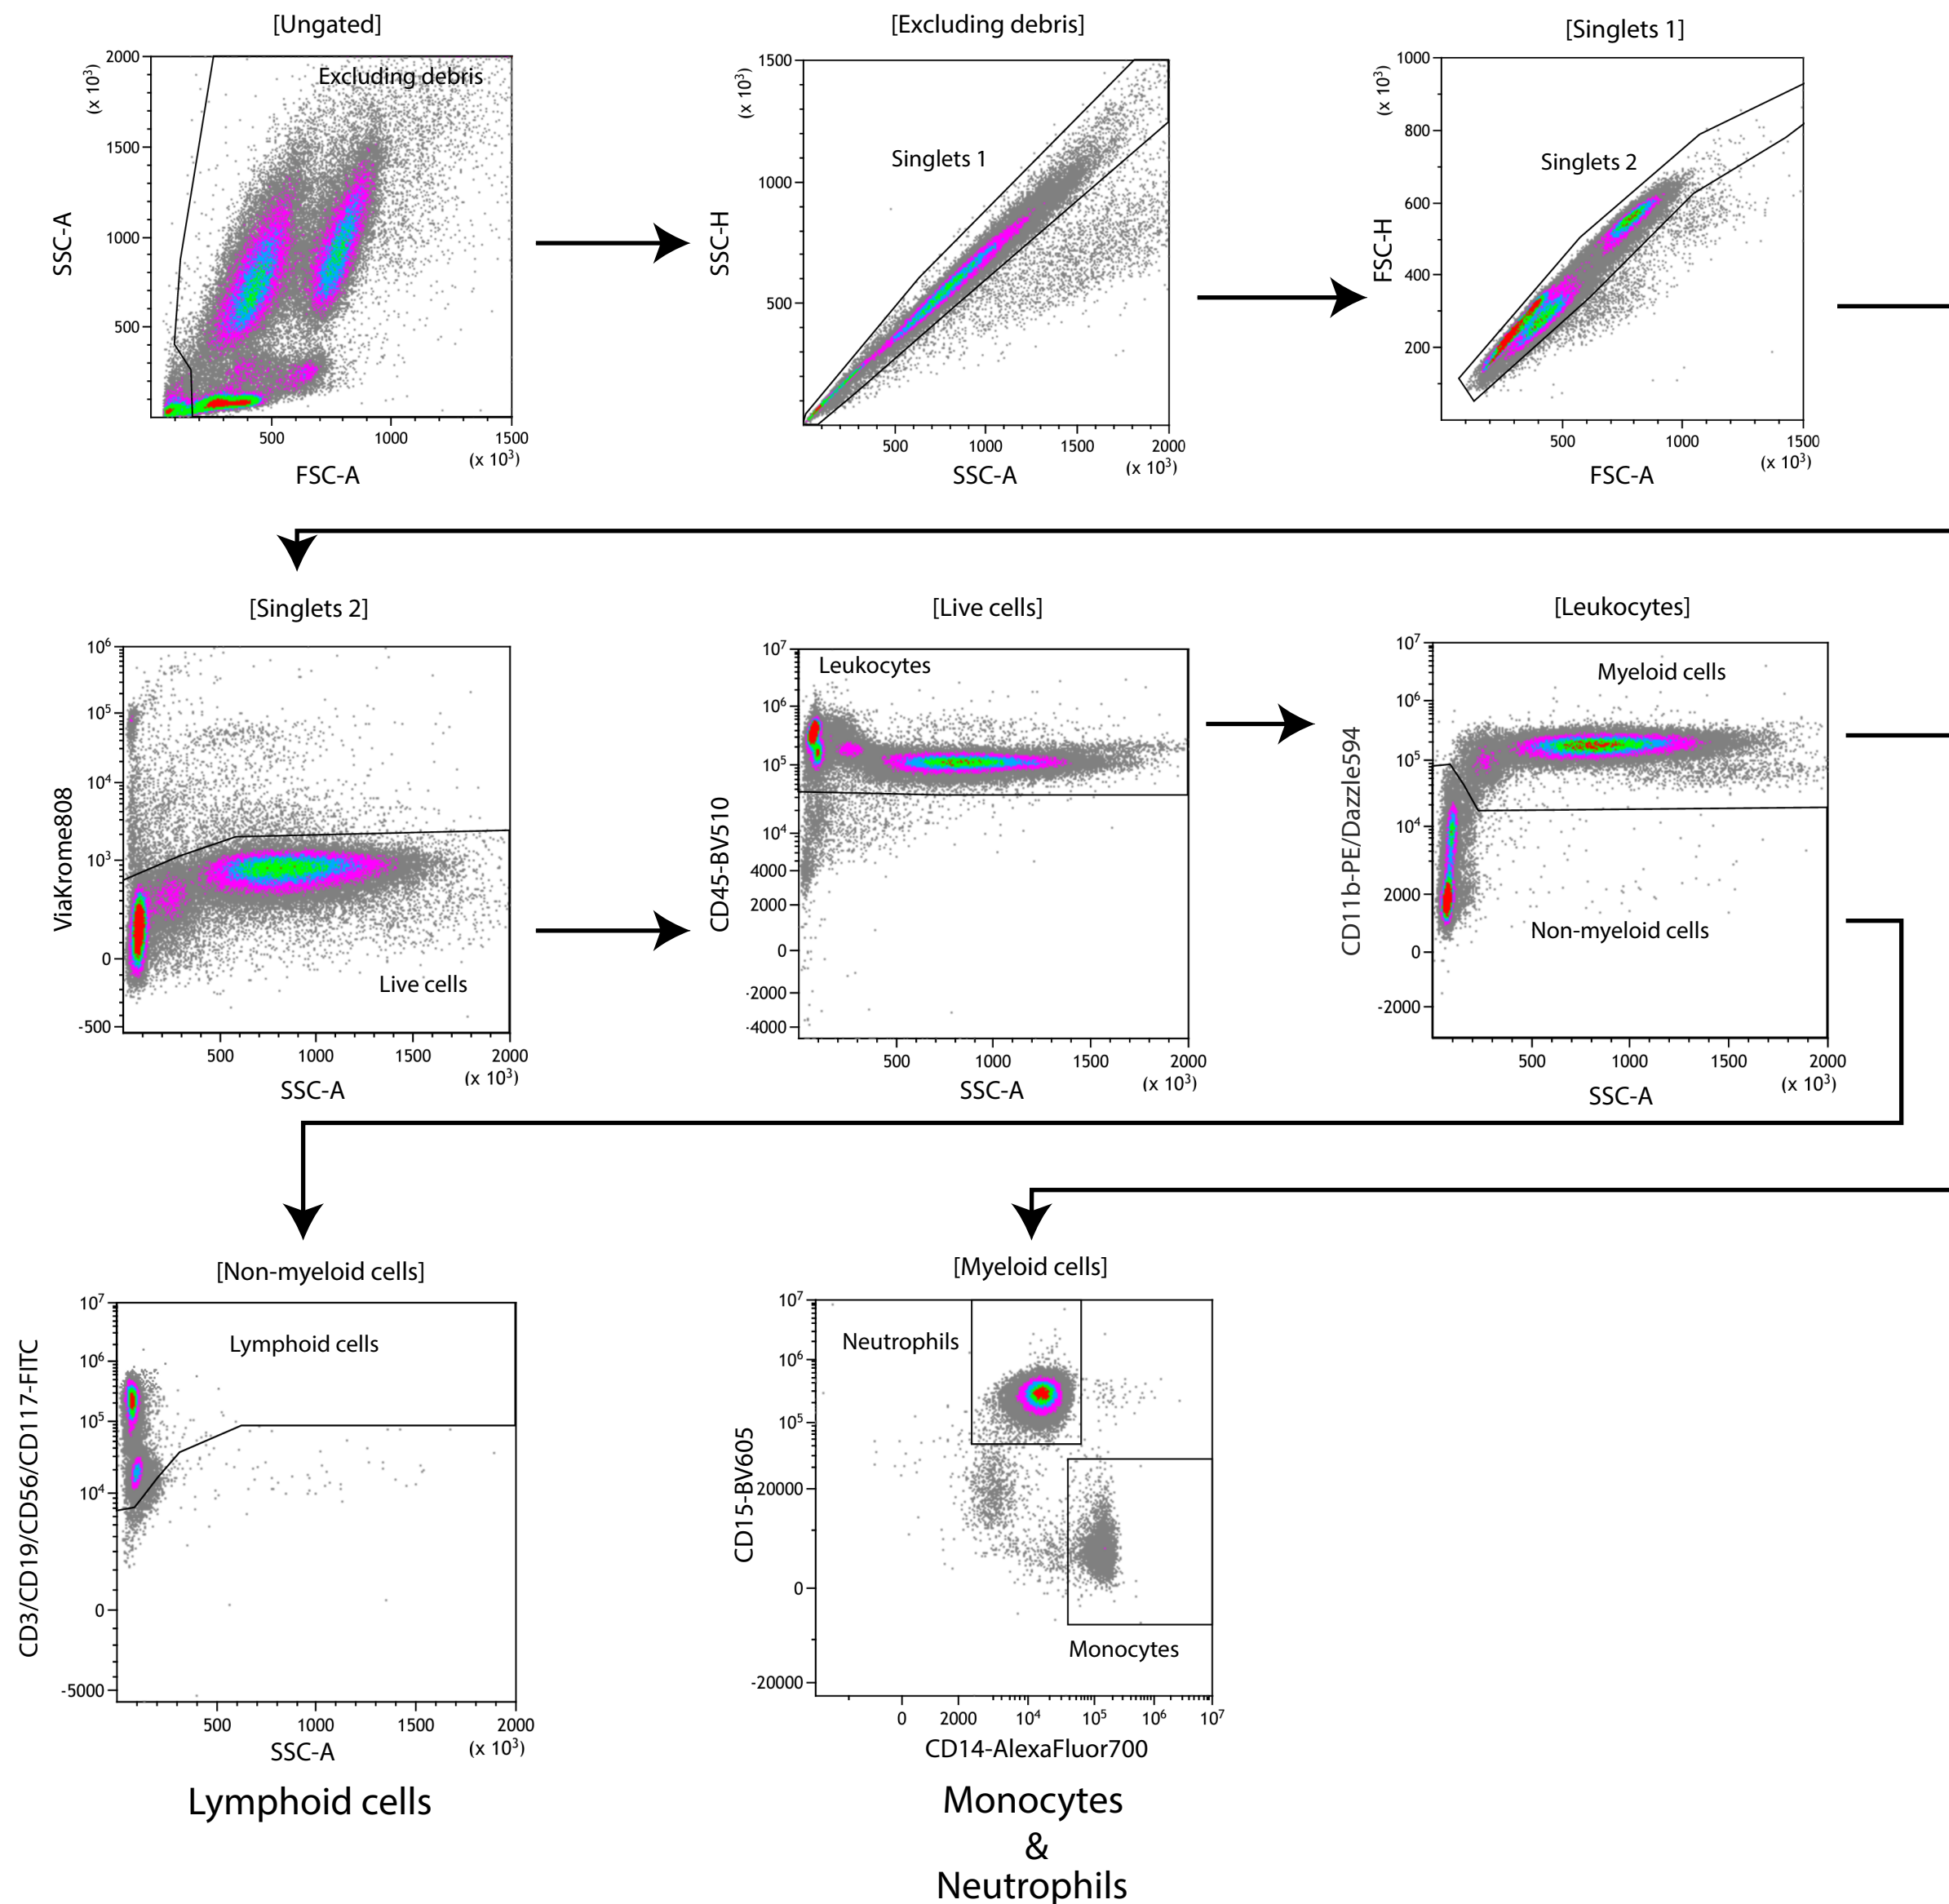

**Additional file 4: Flow cytometry gating strategy for blood cells.** Isolated cells from blood of ACL rupture patients were used for flow cytometric analyses. First, the single, live cells were selected after which we gated for all leukocytes (CD45+). From the leukocyte population, we gated for lymphoid cells (CD11b-CD3+/CD19+/CD56+/CD117+), monocytes (CD11b+CD14+) and neutrophils (CD11b+CD15+).
