# Supplementary material for: Cellular and molecular landscapes of inflammation in anterior cruciate ligament rupture patients are independent on concurrent meniscal injury
Source: Research Square preprint supplement (doi:10.21203/rs.3.rs-7753452/v1), 2025-11-13
Supplement: Supplementary file 4 [file d99121e1680c52b40d7e0c28.pdf]

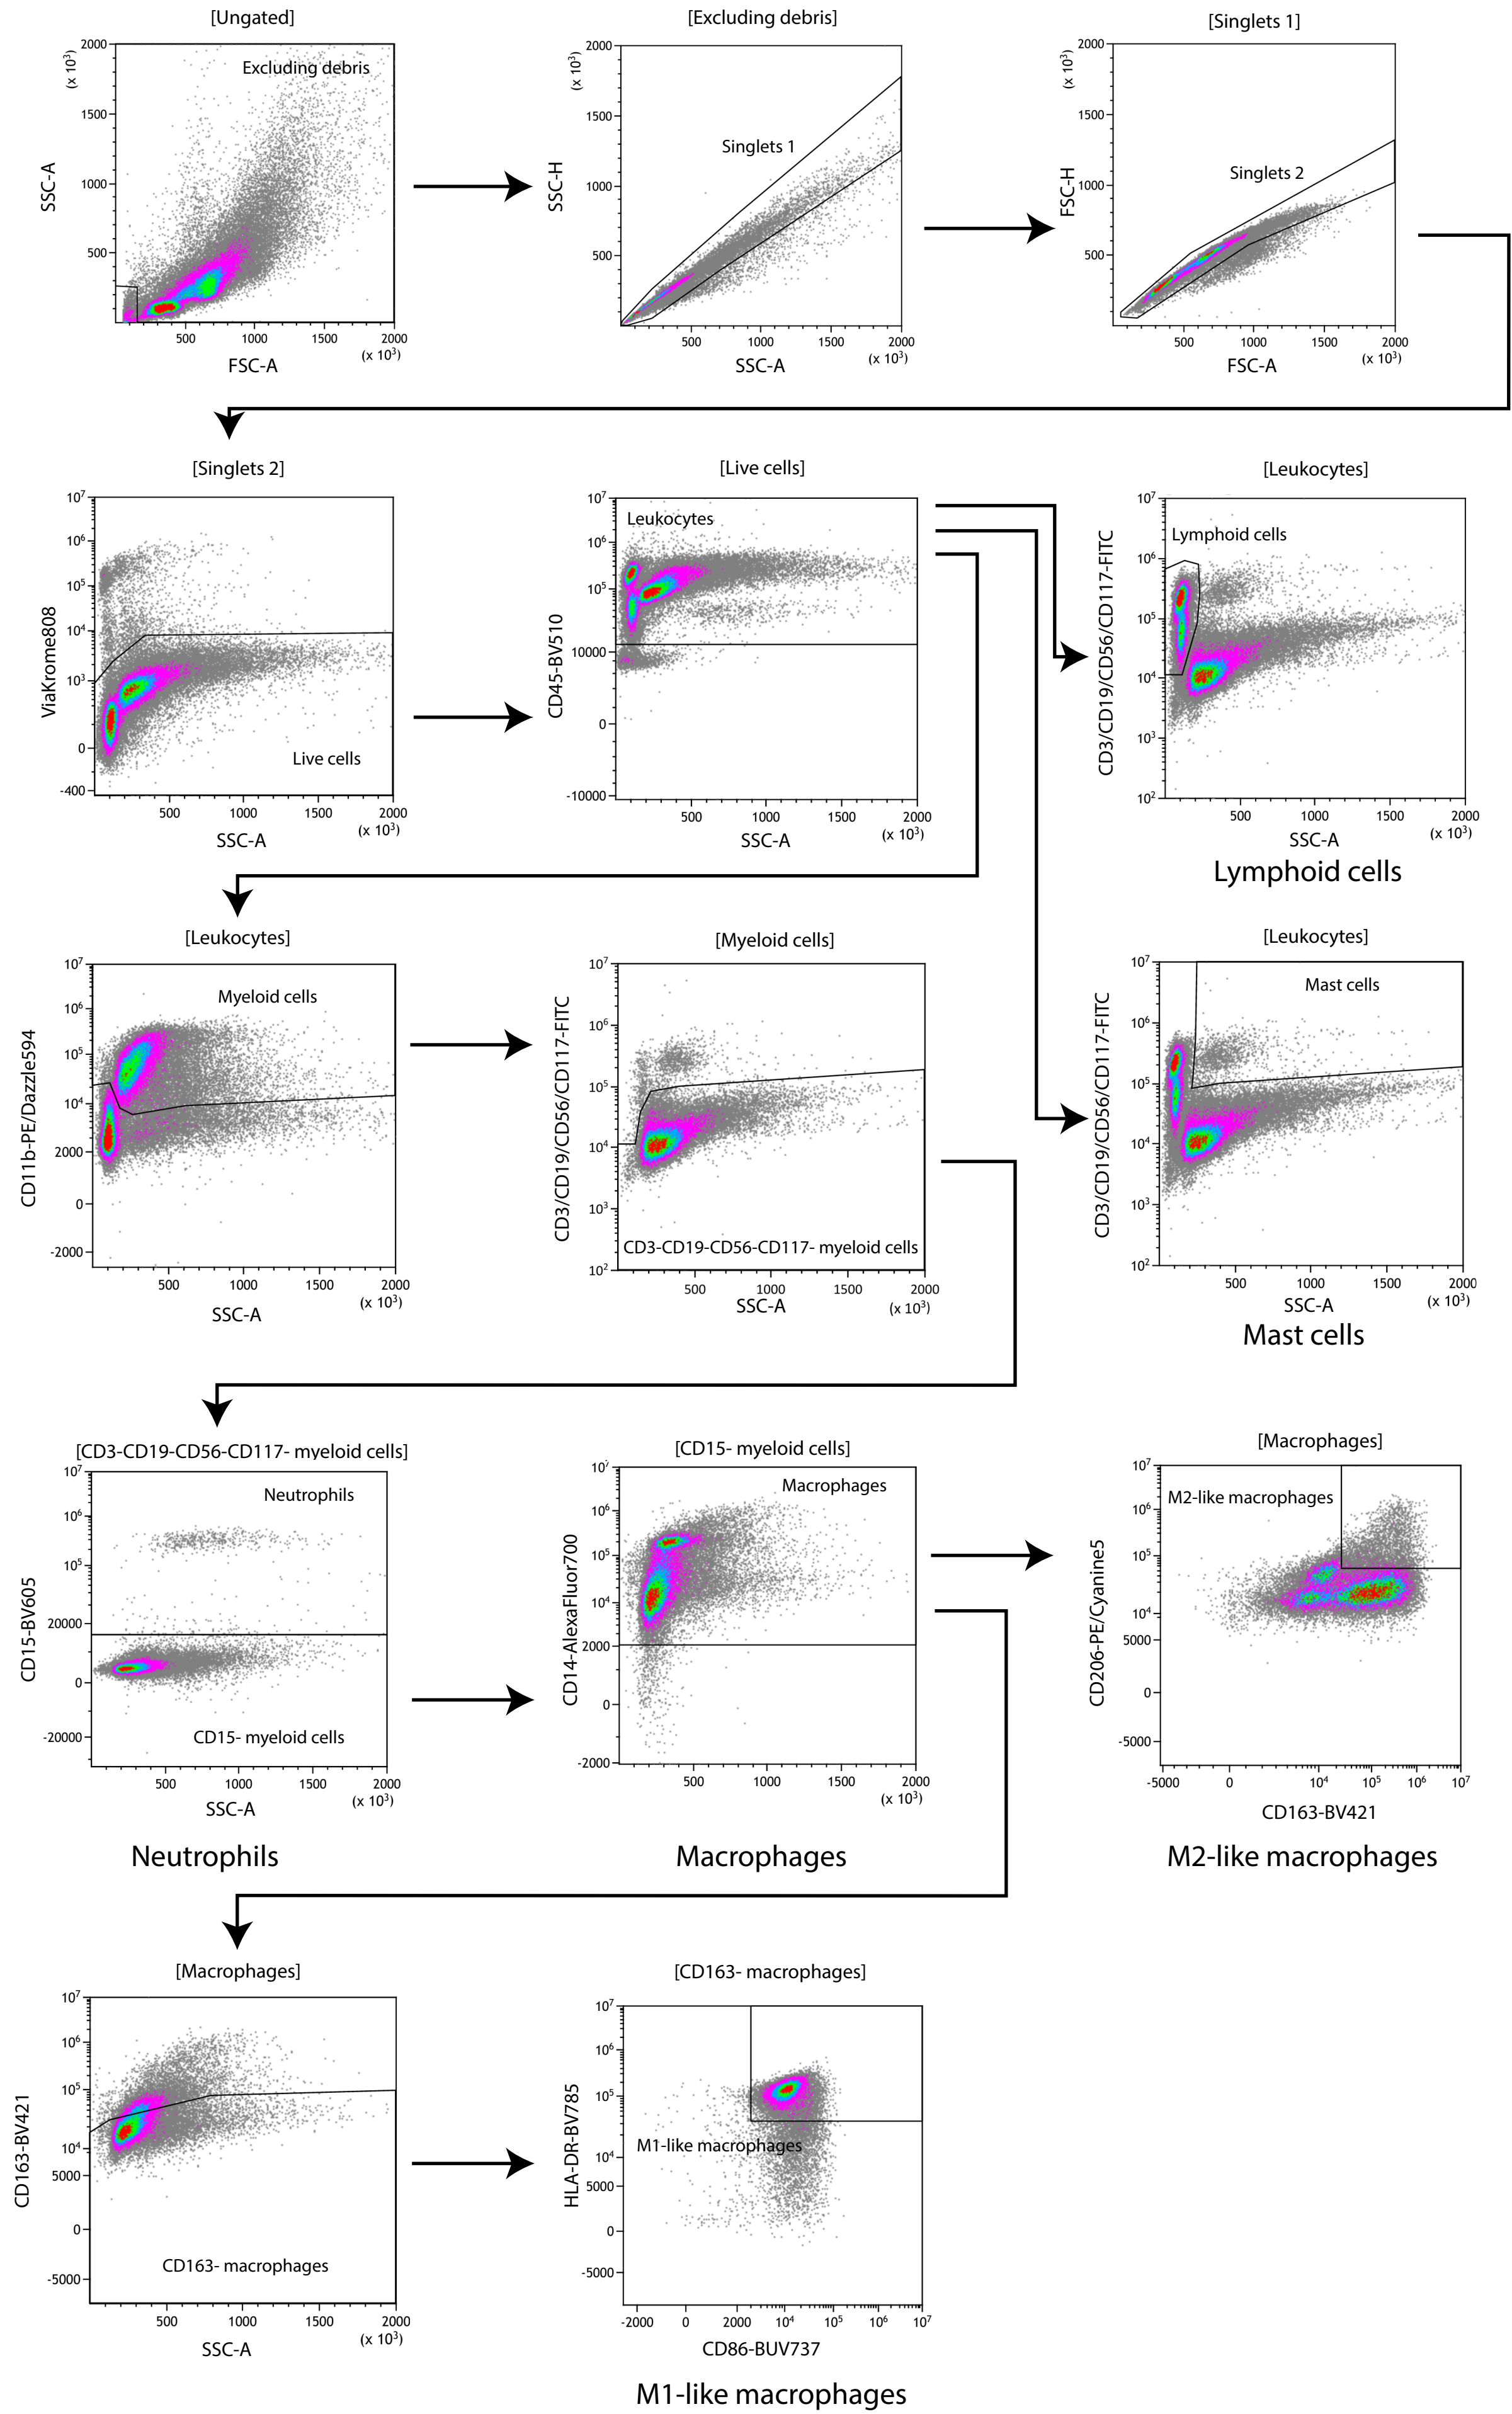

**Additional file 3: Flow cytometry gating strategy for synovial fluid cells.** Isolated cells from synovial fluid of ACL rupture patients were used for flow cytometric analyses. First, the single, live cells were selected after which we gated for all leukocytes (CD45+). From the leukocyte population, we gated for lymphoid cells (CD3+/CD19+/CD56+/CD117+, low side scatter), mast cells (CD3+/CD19+/CD56+/CD117+, high side scatter) and myeloid cells (CD11b+). From the myeloid cells, we gated for the CD3-CD19-CD56-CD117- cells and subsequently gated for neutrophils (CD15+) and macrophages (CD15-CD14+). From the macrophages, we gated for M1-like macrophages (CD163-HLA-DR+CD86+) and M2-like macrophages (CD163+CD206+).
