# Supplementary material for: Cellular and molecular landscapes of inflammation in anterior cruciate ligament rupture patients are independent on concurrent meniscal injury
Source: Research Square preprint supplement (doi:10.21203/rs.3.rs-7753452/v1), 2025-11-13
Supplement: Supplementary file [file 0e8f53590d7952b85bb54199.pdf]

Score 0

Score 1

Score 2

Score 3

Lining thickness

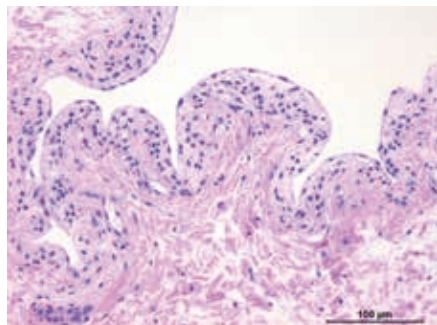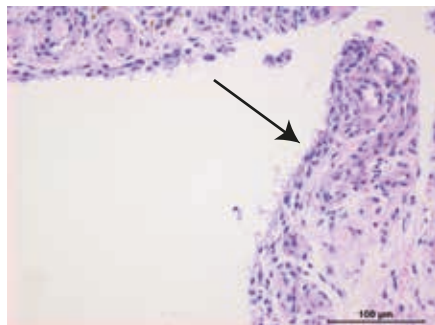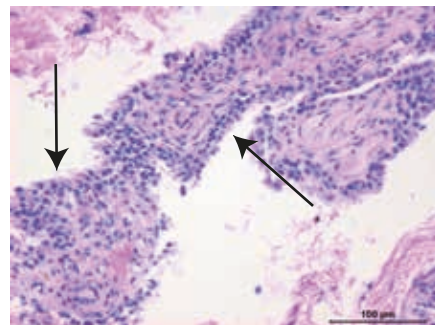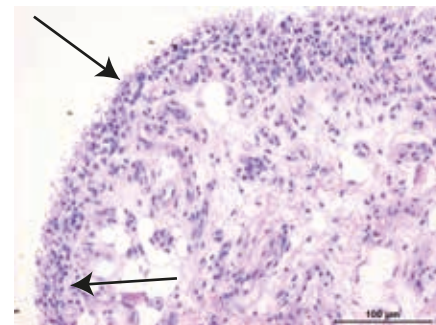

Cell infiltration

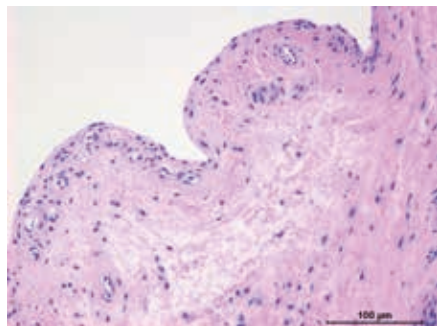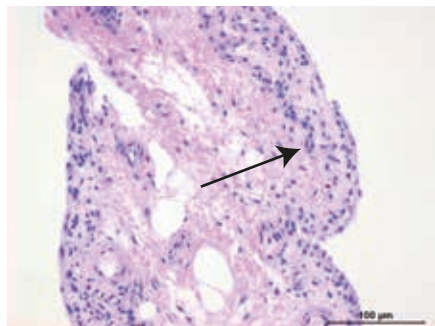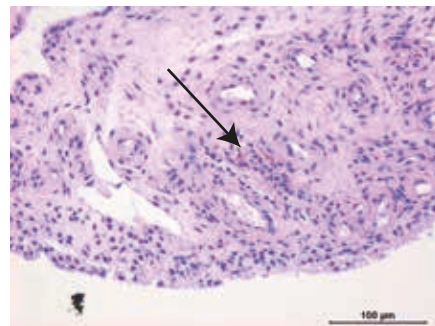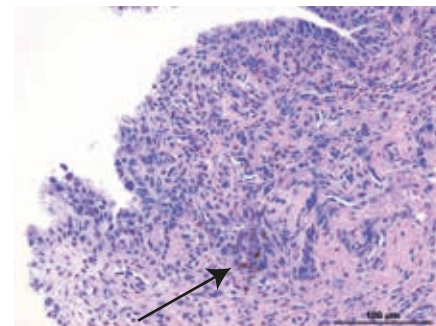

Blood vessels

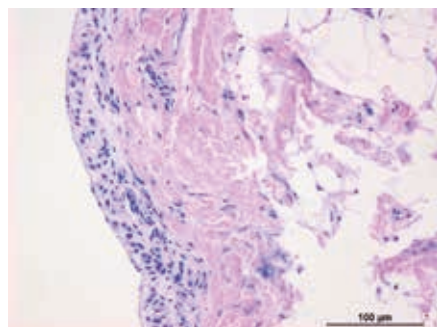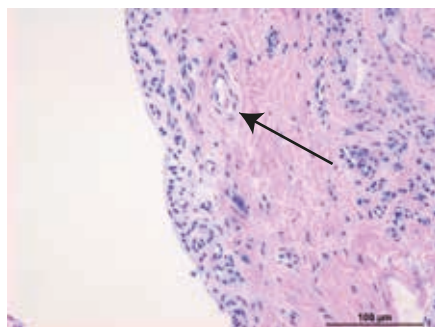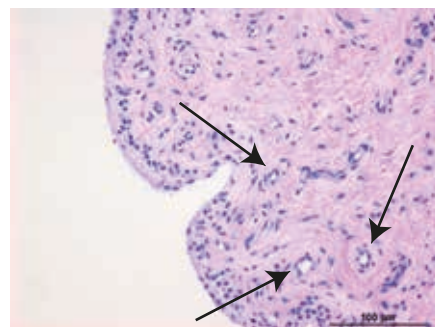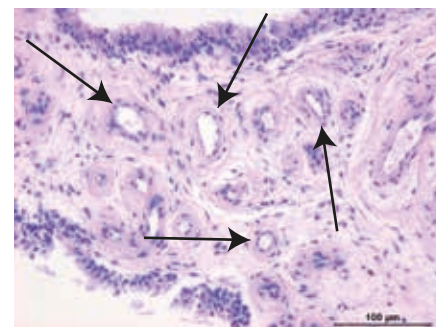

**Additional file 7: Histology scoring system.** Histology was scored on a 0-3 scale for lining thickness, cellular infiltration and vascularisation. Black arrows point out representative places indicative for the score. Scale bar = 100 µM.
