# Supplementary material for: Cellular and molecular landscapes of inflammation in anterior cruciate ligament rupture patients are independent on concurrent meniscal injury
Source: Research Square preprint supplement (doi:10.21203/rs.3.rs-7753452/v1), 2025-11-13
Supplement: Supplementary file [file 8fd09f5b59ad23be51d85984.pdf]

**A**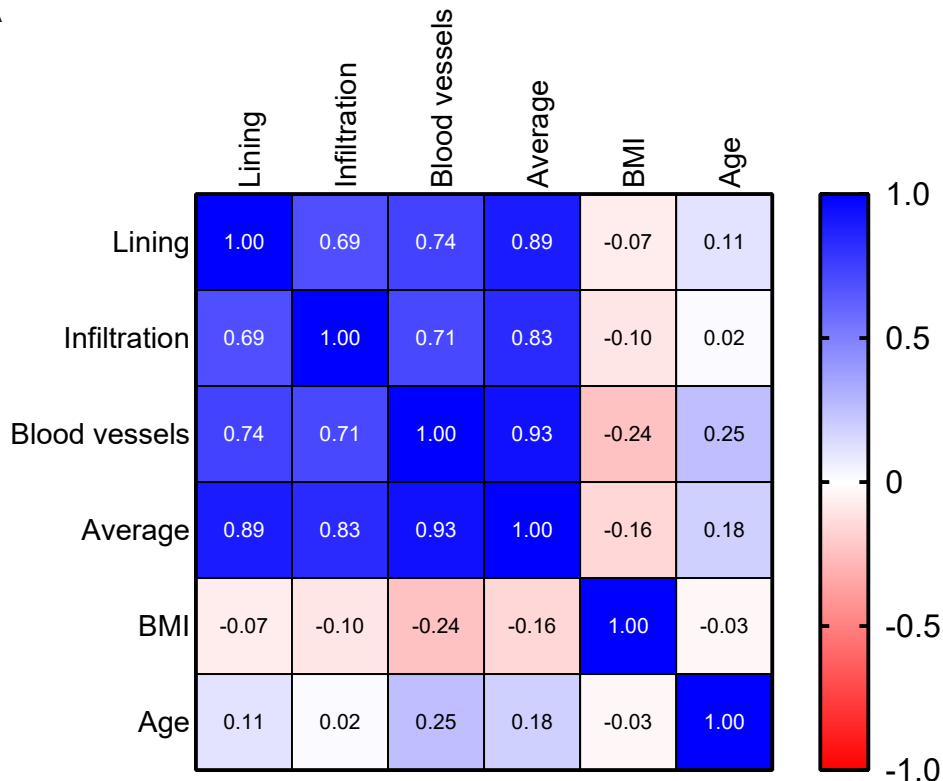

| <i>P</i> values | Lining      | Infiltration | Blood vessels | Average     | BMI    | Age    |
|-----------------|-------------|--------------|---------------|-------------|--------|--------|
| Lining          |             | 0.0002       | 0.00004       | 5.2114e-009 | 0.7404 | 0.6132 |
| Infiltration    | 0.0002      |              | 0.00009       | 4.5932e-007 | 0.6451 | 0.9406 |
| Blood vessels   | 3.8253e-005 | 0.00009      |               | 2.8531e-011 | 0.2574 | 0.2427 |
| Average         | 5.2114e-009 | 4.5932e-007  | 2.8531e-011   |             | 0.4592 | 0.3917 |
| BMI             | 0.7404      | 0.6451       | 0.2574        | 0.4592      |        | 0.8824 |
| Age             | 0.6131      | 0.9406       | 0.2427        | 0.3917      | 0.8824 |        |

**B**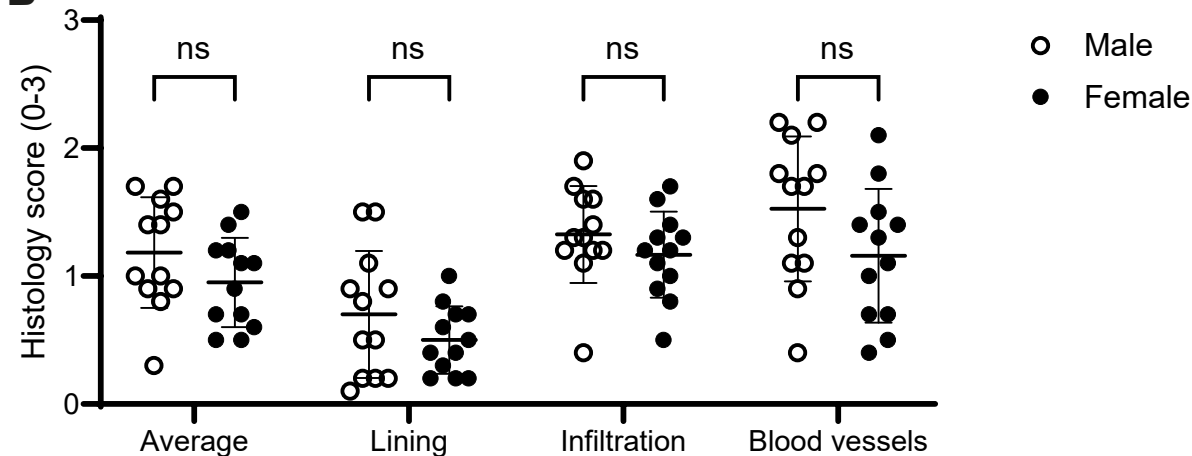

**Additional file 10: Correlations between histology and demographic data.** **A)** Correlation matrix between histology scores, BMI and age. No correlations were found between the histology scores and BMI or age. **B)** No differences were found between males and females regarding histology scores. Horizontal and vertical bars represent mean and standard deviation, respectively. BMI = body mass index; ns = not significant.
