# Supplementary material for: Cellular and molecular landscapes of inflammation in anterior cruciate ligament rupture patients are independent on concurrent meniscal injury
Source: Research Square preprint supplement (doi:10.21203/rs.3.rs-7753452/v1), 2025-11-13
Supplement: Supplementary file [file 73c23861fb3dcc48de821c69.pdf]

### Additional file 5: Overview of the SW1353 reporter cell lines

| Reporter ID | Response element                                       | Signaling pathway                        |
|-------------|--------------------------------------------------------|------------------------------------------|
| AP1         | Activator protein 1 response element                   | MAPK signaling pathway (JNK1:2)          |
| ARE         | Antioxidant response element                           | Nrf2 signaling pathway                   |
| CRE         | cAMP response element                                  | cAMP/PKA (Protein Kinase A) pathway      |
| CSL         | CBF1, Suppressor of Hairless, Lag-1 response element   | Notch signaling pathway                  |
| NFAT5       | Nuclear factor of activated T-cells 5 response element | Osmotic stress response pathway          |
| NFkB        | Nuclear factor $\kappa$ B response element             | NF- $\kappa$ B signaling pathway         |
| SBE         | SMAD binding element                                   | TGF- $\beta$ signaling pathway (SMAD2:3) |
| SIE         | Sis-inducible element                                  | SIS-inducible pathway (STAT1:3)          |
| SRE         | Serum response element                                 | MAPK signaling pathway (ERK1)            |
| SRF         | Serum response factor response element                 | RhoA signaling                           |
